# Supplementary material for: Spectral Discrimination of Six Dominant Seaweed Species in the Intertidal Zone of GouQi Island
Source: Research Square preprint supplement (doi:10.21203/rs.3.rs-877541/v1), 2021-09-15
Supplement: Supplementary file 1 [file 2b96591c66315f763f73cae6.docx]

**Supplementary material**

**APPENDIX 1** Statistics of ANOVA results between different seaweeds

| Spectral parameters | S12 | S13 | S14 | S15 | S16 | S23 | S24 | S25 | S26 | S34 | S35 | S36 | S45 | S46 | S56 |
| --- | --- | --- | --- | --- | --- | --- | --- | --- | --- | --- | --- | --- | --- | --- | --- |
| NDVI(*R*g, *R*r) | * | * | * | * | * | * | * | * | * | * | * | * | * | * | 0.463 |
| NDVI(*A*re, *A*be) | * | 0.897 | * | * | 0.366 | * | * | * | 0.109 | * | * | 1.000 | * | * | * |
| RVI(*R*g, *R*r) | * | * | * | * | * | * | * | * | * | * | * | * | * | * | 0.511 |
| RVI(*A*re, *A*be) | 0.998 | 1.000 | 0.998 | 0.690 | 0.800 | 0.784 | * | * | 0.951 | * | * | 0.366 | * | * | * |
| *V*re | * | * | * | * | * | * | * | * | * | * | * | * | 0.638 | * | * |
| *A*re | * | * | * | 0.547 | * | 0.181 | * | * | 1.000 | * | * | 0.692 | 0.110 | * | * |
| *L*re | * | * | * | * | * | 0.980 | 0.135 | * | * | 0.777 | * | * | * | * | * |
| *R*r | * | 0.118 | * | * | * | * | * | 1.000 | * | * | * | * | 0.218 | 0.143 | * |
| *L*r | * | 0.143 | * | * | * | 0.218 | * | 1.000 | * | * | * | * | * | 0.118 | * |
| *V*be | * | * | * | 0.614 | 0.849 | 0.635 | * | 0.156 | 0.076 | * | * | * | * | * | 1.000 |
| *A*be | * | * | * | * | * | * | * | * | 0.108 | * | * | 1.000 | * | * | * |
| *L*be | * | 0.360 | * | * | * | * | * | * | 0.489 | 0.053 | * | * | * | * | 0.106 |
| *R*g | * | * | * | 0.985 | * | * | * | * | * | * | * | 0.999 | * | * | * |
| *L*g | * | 0.120 | * | * | * | * | * | 0.942 | 0.184 | * | * | * | * | * | * |

“*” Reflects statistical significance p < 0.05, which means there is significant difference; S12 means pairwise comparison between category 1 and category 2; Categories 1-6 are *Chondria crassiaulis*、*Chondrus ocellatus*、*Ulva* *pertusa*、*Sargassum thunbergii*、*Grateloupia filicina*、*Hizikia fusifarme*
